# Supplementary material for: Unhealthy Behaviors and Metabolic Indices of Chronic Kidney Disease in a HCV Hyperendemic Area: A Community-Based Study
Source: Research Square preprint supplement (doi:10.21203/rs.3.rs-684455/v1), 2021-07-08
Supplement: Supplementary file 1 [file 020fd62d561d54d858037d4b.docx]

**Supplementary Table.** The risk of renal impairment in subjects with and without regular exercise stratified by the HBV and HCV status

|  | Number of chronic kidney disease (%) | | OR (95% CI) of  Irregular exercise | *P* for interaction |
| --- | --- | --- | --- | --- |
| Subgroup | Irregular exercise | Adopt regular exercise |
| HBV and HCV status |  |  |  | 0.503 |
| Non HBV and Non HCV | 185 (14.3) | 65 (11.3) | 1.30 (0.96–1.76) |  |
| HBV only | 13 (9.0) | 6 (8.8) | 1.02 (0.37–2.80) |  |
| HCV only | 59 (26.8) | 14 (16.3) | 1.88 (0.99–3.59) |  |

HBV, hepatitis B virus; HCV, hepatitis C virus; OR, odds ratio; CI, confidence interval.
